# Supplementary material for: Degradation Behaviors of Two Epoxy Coatings After Dry/Wet-Accelerated Fog Exposure of Different Solutions
Source: Frontiers journal article supplement (doi:10.3389/fmats.2021.730627), 2021-12-16
Supplement: Table_1.xlsx [file Table_1.xlsx]

## Sheet: Date of figure 2
	(a) clear coating									(b) pigmented coating
		Deioned Water		Mixed Salt		NaCl					Deioned Water		Mixed Salt		NaCl
	Exposure time (days)	Appearance gloss (°)	SD	Appearance gloss (°)	SD	Appearance gloss (°)	SD			Exposure time (days)	Appearance gloss (°)	SD	Appearance gloss (°)	SD	Appearance gloss (°)	SD
	0	130.3	0.47	123	0.01	149.7	0.47			0	56.6	0.36	48.3667	0.37	45.7	0.57
	3	128.3	1.25	125	0.82	139	1.41			3	68.1667	0.63	74.9333	0.46	45.3	0.38
	6	127.3	0.47	118.7	5.19	139.7	0.94			6	53.2667	1.58	72.4333	0.54	46	0.29
	10	127.3	1.25	80	1.28	138.3	0.94			10	78.2	0.26	71.4	4.1	44.2	0.12
	15	130	0.94	6.1	0.67	145.3	1.25			15	69.8667	1.1	77.6333	1.6	62.8	0.09
	20	127.7	0.01	2	0.12	141.3	0.94			20	88.1333	0.94	57.6	2.38	54.7	0.42
	25	121.3	0.47	1.4	0.45	133.7	1.89			25	79.9	0.92	40.5333	3.25	42	0.42
	30	126.3	0.47	1.4	0.08	147.3	0.94			30	85.9	0.43	4	0.85	57.8	0.25
	35	126.7	1.25	1.7	0.05	145	0.82			35	60.9	0.88	1.7	0.29	58.8	0.45

## Sheet: Data of figure 3
	(a) clear coating										(b) pigmented coating
		Deioned Water		Mixed Salt		NaCl						Deioned Water		Mixed Salt		NaCl
	Exposure time (days)	Pendulum hardness (Sec.)	SD	Pendulum hardness (Sec.)	SD	Pendulum hardness (Sec.)	SD				Exposure time (days)	Pendulum hardness (Sec.)	SD	Pendulum hardness (Sec.)	SD	Pendulum hardness (Sec.)	SD
	0	105	0.6	103	2	142	1.1				0	133	3	128	0.6	126	1.7
	3	75	2	59	2	139	0.4				3	147	1	154	0.6	128	1.7
	6	67	1	57	1	140	1.1				6	150	0.6	156	0.6	124	0.6
	10	74	1	47	2	140	0.7				10	154	2.5	148	1	129	0.6
	15	70	0.6	10	0.6	141	0.4				15	148	0.6	146	0	138	1.5
	20	82	0.6	6	0.6	144	0.4				20	160	0.6	139	1.7	138	3
	25	90	1	6	0.6	141	0.4				25	159	1	126	1.5	135	0.6
	30	77	2	5	1	141	0.4				30	161	1.5	28	4	132	0.6
	35	94	1	5	0.6	140	1.1				35	151	1.5	16	0.6	136	0.6

## Sheet: Data of figure 4
(a) clear coating								(b) pigmented coating
	DeW		MixS		NaCl				DeW		MixS		NaCl
Exposure time (days)	Pull-off adhesion (Psi)	SD	Pull-off adhesion (Psi)	SD	Pull-off adhesion (Psi)	SD		Exposure time (days)	Pull-off adhesion (Psi)	SD	Pull-off adhesion (Psi)	SD	Pull-off adhesion (Psi)	SD
0	662	43.1	604	31.2	768	34.1		0	522	26.1	541	30.05	760	38
3	640	39	515	28.75	725	33		4	496	42.8	560	48	784	49.2
6	706	36.3	382	19.5	568	45.3		6	441	22.5	522	36.1	701	38.05
10	698	35.9	359	21.95	595	44.9		10	418	29	384	19.2	662	36.1
15	677	34.85	62	3.1	626	34.85		15	370	20.5	362	20.1	621	35.05
20	651	33.55	44	2.2	594	33.55		20	384	19.2	352	18.6	562	30.1
25	633	35.65	48	2.4	581	36.65		25	372	20.6	278	14.9	519	27.95
30	617	32.85	0	0	587	31.85		30	365	19.25	219	12.95	525	26.52
35	637	38.85	0	0	572	32.85		35	367	20.35	81	14.05	601	35.05

## Sheet: Data of figure 5
	(a) clear coatings							(b) pigmented coatings
		Deionized Water	NaCl	Mixed Salt					Deionized Water	Mixed Salt	NaCl
	Exposure time (days)	f 0.01 (Ω)	f 0.01 (Ω)	f 0.01 (Ω)				Exposure time (days)	f 0.01 (Ω)	f 0.01 (Ω)	f 0.01 (Ω)
	0	9910000000	6990000000	2450000000				0	139000000	34000000	541000000
	3	6770000000	811000000	64800000				3	96900000	1830000	47200000
	6	5400000000	319000000	913				6	6500000	6550000	12200000
	10	1990000000	138000000	337				10	5820000	788000	16000000
	15	890000000	269000000	217				15	8110000	106000	8900000
	20	1060000000	337000000	151				20	7280000	21300	25300000
	25	1050000000	177000000	129				25	1920000	509	8880000
	30	1200000000	93500000	236				30	5500000	127	3850000
	35	284000000	65500000	437				35	2720000	116	1230000

## Sheet: Data of figure 6
	(a) clear coating										(b) pigmented coating
		Deioned Water		Mixed Salt		NaCl						Deioned Water		Mixed Salt		NaCl
	Exposure time (days)	MAR (Ω)	SD	MAR (Ω)	SD	MAR (Ω)	SD				Exposure time (days)	MAR (Ω)	SD	MAR (Ω)	SD	MAR (Ω)	SD
	0	2300000000	105000000	463000000	23150000	5030000000	261500000				0	2830000000	145100000	137000000	7050000	1904000000	105200000
	3	1420000000	71000000	1670000	83500	2890000000	174500000				3	991000000	59550000	24900000	2245000	884000000	54200000
	6	1840000000	122000000	395000	19750	441000000	28050000				6	724000000	46200000	29500000	2750000	157500000	8775000
	10	95800000	4790000	1940	107	213000000	16650000				10	75800000	3790000	21300000	1650000	62250000	4112500
	15	73100000	3655000	3510	205.5	134000000	7700000				15	53800000	2690000	833000	46510	49500000	3475000
	20	94500000	4725000			149000000	7950000				20	30700000	1635000	371000	21550	41800000	3090000
	25	141000000	9050000			154000000	6700000				25	14100000	905000	54800	3040	20500000	2025000
	30	88100000	4805000			56300000	3815000				30	23400000	1570000			44500000	2252000
	35	24800000	2240000			42200000	2710000				35	3870000	213500			26700000	1535000

## Sheet: Data of figure 7
	(a) clear coating										(b) pigmented coating
		Deioned Water		Mixed Salt		NaCl						Deioned Water		Mixed Salt		NaCl
	Exposure time (days)	FPS (Ω)	SD	FPS (Ω)	SD	FPS (Ω)	SD				Exposure time (days)	FPS (Ω)	SD	FPS (Ω)	SD	FPS (Ω)	SD
	0	7000000000	250000000	1040000000	52000000	6010000000	300500000				0	12000000000	300000000	4760000000	293000000	6390000000	205100000
	3	5250000000	262500000	14300000	815000	3440000000	372000000				3	7330000000	366500000	452000000	26200000	4120000000	266000000
	6	5220000000	461000000	5160000	358000	4000000000	212000000				6	3310000000	465500000	164000000	10200000	4030000000	351500000
	10	4420000000	221000000	202000	10100	3970000000	218500000				10	2820000000	245000000	123000000	8150000	1210000000	106500000
	15	3590000000	179500000	168000	9400	3430000000	175500000				15	1780000000	98000000	5690000	304500	1780000000	98000000
	20	3180000000	159000000			2410000000	125500000				20	708000000	38400000	2510000	215500	617000000	38500000
	25	2040000000	102000000			1820000000	81000000				25	207000000	14350000	1120000	65000	501000000	30050000
	30	2660000000	233000000			1160000000	68000000				30	288000000	16400000	923000	46510	365000000	22250000
	35	1910000000	95500000			860000000	46000000				35	285000000	14250000			216000000	12800000

## Sheet: Data of figure 8
		(a) deionized water fog						(b) 0.5wt% NaCl fog						(c) mixed salt fog
			Epoxy Polyamine		Epoxy Polyamide				Epoxy Polyamine		Epoxy Polyamide				Epoxy Polyamine		Epoxy Polyamide
		Fog spray time (Days)	Work function (mv)	SD	Work function (mv)	SD		Fog spray time (Days)	Work function (mv)	SD	Work function (mv)	SD		Fog spray time (Days)	Work function (mv)	SD	Work function (mv)	SD
		0	-688.448	13.2539	-189.856	9.61026		0	-333.468	10.3992	-498.263	7.57255		0	-225.99	8.97606	-211.599	6.91919
		3	-219.538	8.72835	-292.827	11.0231		3	-340.13	9.70694	-636.515	6.33075		3	-1149.7	16.8619	-284.133	8.2205
		6	-495.508	13.3263	-578.728	22.7185		6	-309.438	8.80232	-316.529	5.23726		6	-1156.8	10.4885	-404.692	10.1882
		10	-231.926	10.5849	-544.959	11.1142		10	-308.018	8.40173	-308.295	5.9841		10	-997.042	15.3702	-530.499	20.6514
		15	-630.931	13.7836	-550.088	13.1694		15	-408.835	10.4585	-304.809	4.75058		15	-910.465	8.94817	-962.284	13.1739
		20	-608.453	10.6218	-495.831	12.5185		20	-309.964	10.6534	-534.135	5.70531		20	-1059.58	16.1779	-771.072	7.21729
		25	-77.7564	9.87569	-541.736	9.67246		25	-283.723	9.39513	-691.884	5.34148		25	-897.269	8.19931	-733.576	16.2893
		30	-126.685	9.29667	-442.877	10.8922		30	-318.882	9.9683	-550.477	6.4472		30	-611.439	11.5188	-480.029	9.50728
		35	-508.75	10.2596	-401.613	9.98654		35	-429.721	10.6028	--	--		35	-1027.98	14.9932	-1040.76	17.4274

## Sheet: Data of table 1
	Deionized water fog (n=9)										0.5wt% NaCl fog (n=9)										Mixed salt fog
	Gloss	Hardness	Adhesion	EIS	SDM	FPS	SKP				Gloss	Hardness	Adhesion	EIS	SDM	FPS	SKP				Gloss	Hardness	Adhesion	EIS	SDM	FPS	SKP
	97.1	105	662	9910000000	2300000000	7000000000	-688				98.6	142	768	6990000000	5030000000	6010000000	-333				96.8	103	604	2450000000	463000000	1040000000	-226
	97.9	75	640	6770000000	1420000000	5250000000	-220				98.7	139	725	811000000	2890000000	3440000000	-340				98.7	59	515	64800000	1670000	14300000	-1150
	96.8	67	706	5400000000	1840000000	5220000000	-496				99.2	140	568	319000000	441000000	4000000000	-309				92.2	57	382	913	395000	5160000	-1157
	97.1	74	698	1990000000	95800000	4420000000	-232				98.6	140	595	138000000	213000000	3970000000	-308				53.7	47	359	337	1940	202000	-997
	96.3	70	677	890000000	73100000	3590000000	-631				98.4	141	626	269000000	134000000	3430000000	-409				1.6	10	62	217	3510	168000	-910
	98	82	651	1060000000	94500000	3180000000	-608				97.9	144	594	337000000	149000000	2410000000	-310				1	6	44	151			-1060
	98.8	90	633	1050000000	141000000	2040000000	-78				97.2	141	581	177000000	154000000	1820000000	-284				1	6	48	129			-897
	98.4	77	617	1200000000	88100000	2660000000	-127				98.4	141	587	93500000	56300000	1160000000	-319				1	5	0	236			-611
	99.3	94	637	284000000	24800000	1910000000	-509				97.9	140	572	65500000	42200000	860000000	-430				0.7	5	0	437			-1028

## Sheet: Data of table 2
	Deionized water fog (n=9)										0.5wt% NaCl fog (n=9)										Mixed salt fog
	Gloss	Hardness	Adhesion	EIS	SDM	FPS	SKP				Gloss	Hardness	Adhesion	EIS	SDM	FPS	SKP				Gloss	Hardness	Adhesion	EIS	SDM	FPS	SKP
	56.6	133	522	139000000	2830000000	12000000000	-190				45.7	126	760	541000000	1900000000	6390000000	-498				48.4	128	541	34000000	137000000	4760000000	-212
	68.2	147	496	96900000	991000000	7330000000	-293				45.3	128	784	47200000	884000000	4120000000	-637				74.9	154	560	1830000	24900000	452000000	-284
	53.3	150	441	6500000	724000000	3310000000	-579				46	124	701	12200000	158000000	4030000000	-317				72.4	156	522	6550000	29500000	164000000	-405
	78.2	154	418	5820000	75800000	2820000000	-545				44.2	129	662	16000000	62300000	1210000000	-308				71.4	148	384	788000	21300000	123000000	-530
	69.9	148	370	8110000	53800000	1780000000	-550				62.8	138	621	8900000	49500000	1780000000	-305				77.6	146	362	106000	833000	5690000	-962
	88.1	160	384	7280000	30700000	708000000	-496				54.7	138	562	25300000	41800000	617000000	-534				57.6	139	352	21300	371000	2510000	-771
	79.9	159	372	1920000	14100000	207000000	-542				42	135	519	8880000	20500000	501000000	-692				40.5	126	278	509	54800	1120000	-734
	85.9	161	365	5500000	23400000	288000000	-443				57.8	132	525	3850000	44500000	365000000	-550				4	28	219	127		923000	-480
	60.9	151	367	2720000	3870000	285000000	-402				58.8	136	601	1230000	26700000	216000000	-589				1.7	16	81	116			-1041
